# Supplementary material for: From Fossil to Bio–Based AESO–TiO2 Microcomposite for Engineering Applications
Source: Preprints.org preprint supplement (doi:10.20944/preprints202411.0441.v1), 2024-11-07
Supplement: Supplementary file 1 [file supplementary]

## From fossil to bio-based AESO–TiO<sub>2</sub> microcomposite for engineering applications

Cristian–Dragos Varganici\*, Liliana Rosu, Dan Rosu, Mihai Asandulesa

“Petru Poni” Institute of Macromolecular Chemistry, 41A Gr. Ghica–Voda Alley,  
700487 Iasi, Romania

\* Corresponding author. E-mail: [varganici.cristian@icmpp.ro](mailto:varganici.cristian@icmpp.ro)

### Test S1: Characterization of the acrylated and epoxidized soybean oil (AESO)

The presence of the acrylate group in AESO was demonstrated via the <sup>1</sup>H–NMR technique. Figure S1 depicts the <sup>1</sup>H–NMR spectrum of AESO. The signal peaks at 5.7–6.2 ppm are consistent with acrylate ester entities. The signal peaks from 5.1–5.3 ppm and 4–4.5 ppm denote the –CH<sub>2</sub>–CH–CH<sub>2</sub>– glycerol methine and glycerol methylene protons, respectively, from the triglyceride backbone [1]. The weak signals in the range 3.2–4 ppm correspond to each hydroxyl group created for every acrylate moiety bonded to a triglyceride. The low intensity peaks in the range 2.8–3.2 ppm describe the protons of the epoxide ring owed to incomplete acrylation. A complete acrylation reaction of epoxidized soybean oil has not yet been reported, due to the bulkiness of the triglyceride molecule [2]. The following peaks are also attributed: –(CH<sub>2</sub>)<sub>n</sub>– at 1.1–1.4 ppm, terminal –CH<sub>3</sub> at 0.9–1.1 ppm, α–CH<sub>2</sub>–(C=O)–O– at 2.2–2.4 ppm and β–CH<sub>2</sub>–(C=O)–O– at 1.6–1.8 ppm [2]. In order to calculate the number of acrylate groups per molecule AESO or acrylation degree the peak of terminal –CH<sub>3</sub> groups (0.9–1.1 ppm) was used as internal standard. The acrylation degree was estimated from the ratio of peak areas  $A_{5.7-6.2 \text{ ppm}}/A_{0.9-1.1 \text{ ppm}}$  and found to be 2.42. This is in good agreement with literature data, according to which the acrylation degree for the commercial AESO Vikoflex© 7170, for example, is 2.76 [2].

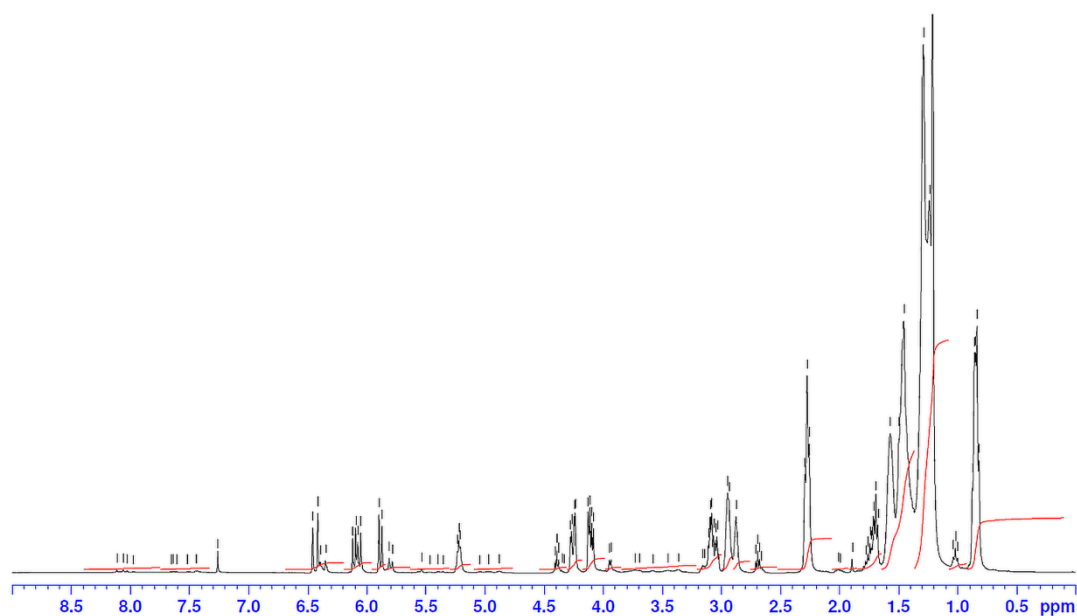

**Figure S1.** The  $^1\text{H}$ -NMR spectrum of AESO

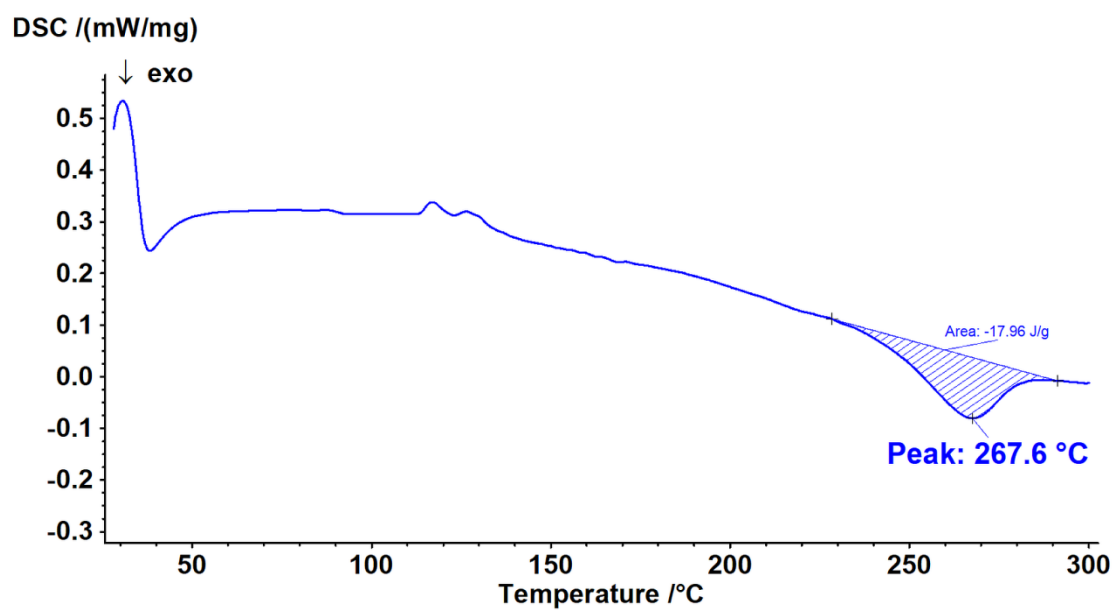

**Figure S2.** The first DSC heating curve of AESO –TiO<sub>2</sub> formulation.

**Table S1.** Thermal analyses data.

| Sample                | Stage | T <sub>s</sub> (°C) | T <sub>5%</sub><br>(°C) | T <sub>peak</sub><br>(°C) | T <sub>30%</sub><br>(°C) | M<br>(%) | R (%) | T <sub>g</sub> (°C) |
|-----------------------|-------|---------------------|-------------------------|---------------------------|--------------------------|----------|-------|---------------------|
| AESO                  | I     |                     |                         | 390                       |                          | 64.31    |       |                     |
|                       | II    | 150                 | 197                     | 420                       | 380                      | 17.83    | 5.46  | –                   |
|                       | III   |                     |                         | 454                       |                          | 12.35    |       |                     |
| AESO–m                | I     |                     |                         | 393                       |                          | 57.14    |       |                     |
|                       | II    | 180                 | 340                     | 426                       | 387                      | 19.85    | 7.49  | –20                 |
|                       | III   |                     |                         | 460                       |                          | 14.71    |       |                     |
| AESO–TiO <sub>2</sub> | I     |                     |                         | 400                       |                          | 48.89    |       |                     |
|                       | II    | 183                 | 342                     | 430                       | 395                      | 28.17    | 5.52  | –10                 |
|                       | III   |                     |                         | 462                       |                          | 16.49    |       |                     |

T<sub>s</sub> – static heat resistant index; T<sub>5%</sub> – temperature at 5% mass loss; T<sub>peak</sub> – temperature of maximum rate of decomposition; T<sub>30%</sub> – temperature at 30% mass loss; M – percentage of mass loss for each stage; R – percentage of mass residue remained at 700 °C; T<sub>g</sub> – glass transition temperature

## References

1. Campanella A, La Scala JJ, Wool RP (2011) Fatty acid–based comonomers as styrene replacements in soybean and castor oil-based thermosetting polymers. *J Appl Polym Sci* 119:1000-1010. doi: 10.1002/app.32810
2. Saithai P, Lecomte J, Dubreucq E, Vanrattanakul V (2013) Effects of different epoxidation methods of soybean oil on the characteristics of acrylated epoxidized soybean oil–co–poly(methyl methacrylate) copolymer. *Express Polym Lett* 7:910-924. doi: 10.3144/expresspolymlett.2013.89
